# Supplementary material for: Evaluation of copper metabolism in neonatal rats by speciation analysis using liquid chromatography hyphenated to ICP mass spectrometry
Source: Royal Society of Chemistry journal article supplement (doi:10.1039/c9mt00158a), 2019-07-31
Supplement: c9mt00158a1.pdf [file c9mt00158a1.pdf]

## Electronic supplementary information

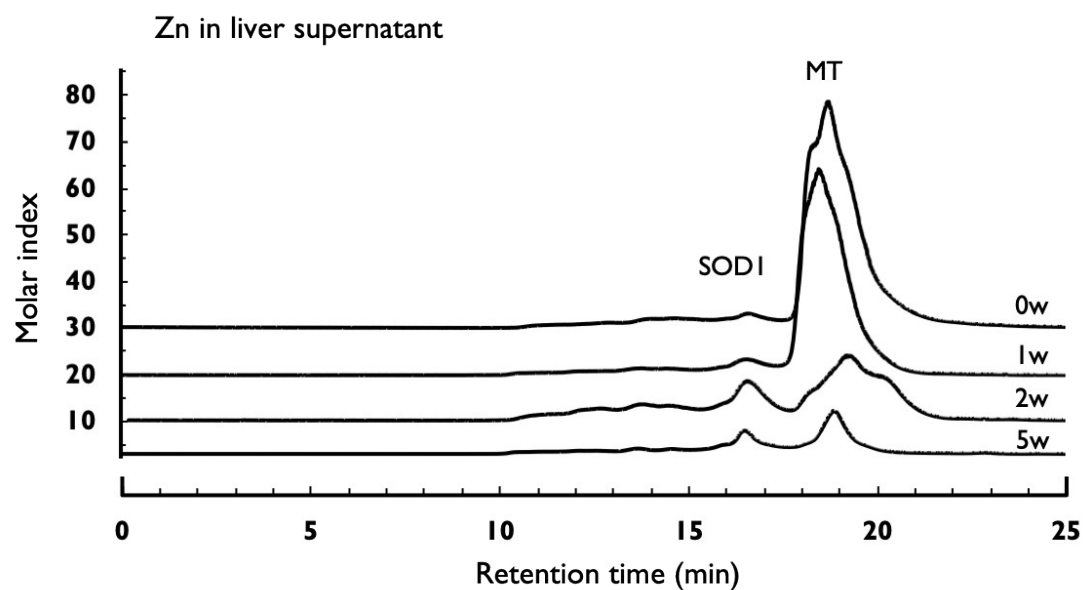

ESI Fig. 1 Elution profiles of Zn in liver. The averaged elution profiles for kidney supernatant are shown within the retention time range of 0–25 min. Peaks marked by “MT” and “SOD1” correspond to the elution of metallothionein, and superoxide dismutase, respectively. Chromatographic separation was carried out using size exclusion column (G3000SWXL).

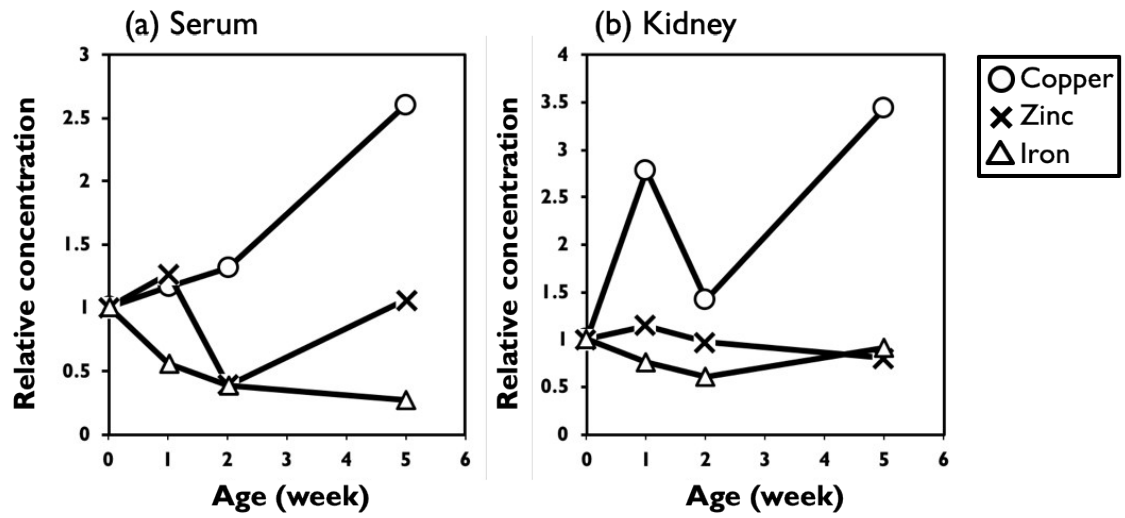

ESI Fig. 2 Time-dependent changes in relative concentrations of Cu, Zn, and Fe in (a) serum and (b) kidney. The concentrations of Cu (open circle), Zn (cross), and Fe (open triangle) were normalized to the data of 0-week-old rats.
